1 **Title:** Procalcitonin and High APACHE Scores are Associated with the Development of  
2 Acute Kidney Injury in Patients with SARS-CoV-2.

3  
4 Andrade Sierra Jorge<sup>1,2,3</sup>, Delgado Astorga Claudia<sup>1</sup>, Nava Vargas Miriam Gabriela<sup>1</sup>, Rojas  
5 Campos Enrique<sup>3</sup>, Arellano Arteaga Kevin Javier<sup>1</sup>, Hernández Morales Karla<sup>1</sup>, Andrade  
6 Castellanos Carlos A<sup>1</sup>, Andrade-Ortega Antonio de Jesús<sup>2</sup>, González-Correa Luis Gerardo<sup>3</sup>.

7 <sup>1</sup>Department of Internal Medicine. Hospital Civil de Guadalajara “Dr. Juan I Menchaca”.  
8 Guadalajara, Jalisco, Mexico.

9 <sup>2</sup>Department of Physiology, University Health Sciences Center, University of Guadalajara,  
10 Guadalajara, Jalisco, Mexico.

11 <sup>3</sup>Medical Research Unit in Kidney Diseases, Specialties Hospital, National Western Medical  
12 Center, Mexican Institute of Social Security. Guadalajara, Jalisco, Mexico.

13

14

15 **Corresponding author:** Jorge Andrade Sierra, MD, PhD

16 Department of Physiology, University Health Sciences Center (*Centro Universitario de*  
17 *Ciencias de la Salud*), University of Guadalajara, Guadalajara, Jalisco, Mexico.

18 Sierra Mojada No. 950, Col. Independencia

19 Guadalajara, Jalisco, México CP 44340

20 Phone: +52 (33) 10585200

21 E-mail: [jorg\\_andrade@hotmail.com](mailto:jorg_andrade@hotmail.com)

22

23

24

25

26

27

28 **Abbreviations**

29 Coronavirus 2019 (COVID-19)

30 Systemic arterial hypertension (SAH)

31 Diabetes mellitus (DM)

32 Acute kidney injury (AKI)

33 C-reactive protein (CRP)

34 Procalcitonin (PCT)

35 Lactate dehydrogenase (LDH)

36 Alanine aminotransferase (ALT)

37 SCr: Serum creatinine

38 Continuous Renal Replacement Therapy (CRRT)

39 Reverse Transcriptase Polymerase Chain Reaction (RT-PCR)

40 Kidney Disease Improving Global Outcomes (KDIGO)

41 Acute Physiology and Chronic Health Evaluation II (APACHE II)

42 Sequential Organ Failure Assessment (SOFA)

43 Estimated glomerular filtration rate (eGFR)

44 Chronic Kidney Disease (CKD)

45 Oxygen to fraction of inspired oxygen ( $\text{PaO}_2/\text{FiO}_2$ )

46 Body Mass Index (BMI)

47 Invasive mechanical ventilation (IMV)

48 Angiotensin-converting Enzyme Inhibitors (ACEi)

49 Angiotensin receptor blockers (ARBs)

50 Neutrophil gelatinase-associated lipocalin (NGAL)

51 Kidney injury molecule 1 (KIM-1)

52

53

54

55 **Abstract**

56 **Background.** Acute kidney injury (AKI) is associated with poor outcomes in patients infected  
57 with SARS-CoV-2. Sepsis, direct injury to kidney cells by the virus, and severe systemic  
58 inflammation are mechanisms implicated in its development. We investigated the association  
59 between inflammatory markers (C-reactive protein, procalcitonin, D-dimer, lactate  
60 dehydrogenase, and ferritin) in patients infected with SARS-CoV-2 and the development of  
61 AKI. **Methods:** A prospective cohort study performed at the Civil Hospital (Dr. Juan I.  
62 Menchaca) Guadalajara, Mexico, included patients aged >18 years with a diagnosis of SARS-  
63 CoV-2 pneumonia confirmed by RT-PCR and who did or did not present with AKI (KDIGO)  
64 while hospitalized. Biomarkers of inflammation were recorded, and kidney function was  
65 estimated using the CKD-EPI formula. **Results:** 291 patients were included (68% men; mean  
66 age, 57 years). The incidence of AKI was 40.5% (118 patients); 21% developed stage 1 AKI,  
67 6% developed stage 2 AKI, and 14% developed stage 3 AKI. The development of AKI was  
68 associated with phosphate higher ( $p = 0.002$ ) (RR 1.39, CI 95% 1.13 – 1.72), high  
69 procalcitonin levels at hospital admission ( $p = 0.005$ ) (RR 2.09, CI 95% 1.26-3.50), and high  
70 APACHE scores ( $p = 0.011$ ) (RR 2.0, CI 95% 1.17-3.40). The survival analysis free of AKI  
71 according to procalcitonin levels and APACHE scores demonstrated a lower survival in  
72 patients with procalcitonin >0.5 ng/ml ( $p = 0.001$ ) and APACHE >15 points ( $p = 0.004$ ).  
73 **Conclusions:** phosphate, high procalcitonin levels, and APACHE scores >15 were predictors  
74 of AKI development in patients hospitalized with COVID-19.

75 **Key words.** Acute kidney injury, SARS-CoV-2, inflammatory markers.

76

77

78

79

80

81

82

83 **Introduction.**

84 The coronavirus 19 (COVID-19) pandemic, which originated with the novel coronavirus  
85 (SARS-CoV-2), caused 318 thousand deaths in Mexico as of February 2022 (1). Older adults  
86 with comorbidities(2, 3) are at a higher risk of complications from SARS-CoV-2 infections.  
87 Kidney damage is one of the main complications and can be demonstrated by the presence of  
88 hematuria, proteinuria (4-6), and the development of acute kidney injury (AKI), with high  
89 incidence reported in hospitalized patients.(7-10) The severity leads to even higher mortality,  
90 which has a multifactorial etiology (11, 12). Nevertheless, baseline characteristics, patient  
91 interventions in critical care, and organ crosstalk are mechanisms that influence the  
92 appearance of AKI, but possible direct injury by the virus on kidney cells (podocytes,  
93 proximal tubule cells, and the epithelial cells of Bowman’s capsule (13-15)) and uncontrolled  
94 systemic inflammation are factors that also influence its development and severity in patients  
95 with COVID-19 (4, 16, 17). Inflammation and the consequent increase in some biomarkers  
96 also appear to be associated with kidney damage and poor outcomes (2, 3, 18-25). In fact, the  
97 therapeutic conduct for the prevention of developing AKI associated with COVID-19 is  
98 similar to other etiologies (avoiding nephrotoxins, periodic review of serum creatinine (SCr),  
99 urinary output, and hemodynamic monitoring), and in critically ill patients with COVID-19, it  
100 could reduce the appearance or severity of AKI (26). Our hospital has been a referral center  
101 for patients without social security throughout the pandemic, and the limitations of some  
102 resources, such as urinary markers (neutrophil gelatinase-associated lipocalin (NGAL) and  
103 kidney injury molecule 1 (KIM-1)), demand the use of low-cost inflammatory markers to  
104 predict the development of AKI. Our objective was to determine the existing association  
105 between CRP, PCT, D-dimer, LDH, and ferritin levels and the development and severity of  
106 AKI in patients hospitalized with pneumonia caused by SARS-CoV-2 without social security.

107 **Methods**

108 A prospective cohort study was performed in patients without social security coverage  
109 (Internal Medicine Department “Dr. Juan I. Menchaca” Civil Hospital in Guadalajara) from  
110 March 1, 2020, to March 1, 2021. All patients tested positive for SARS-CoV-2 using reverse  
111 transcriptase polymerase chain reaction (RT-PCR). Based on the development of AKI using  
112 the Kidney Disease Improving Global Outcomes (KDIGO) classification, patients were  
113 classified into two groups: those with and without AKI. All patients in our study had normal

114 kidney function when admitted to the hospital, and we could not clinically determine  
115 infections other than COVID-19.

#### 116 *Data collection*

117 Quantitative polymerase chain reaction (RT-PCR) was used to determine the presence of  
118 SARS-CoV-2 in the nasopharyngeal swabs. All registered patients were tested for  
119 inflammatory biomarkers (lactate dehydrogenase, ferritin, highly sensitive C-reactive protein,  
120 D-dimer, and procalcitonin) upon admission and during hospitalization, and the following  
121 data were collected: age, sex, history of smoking, alcoholism, prescribed medication use, and  
122 comorbidities. The patients' anthropometric characteristics and presence of other infections  
123 (as documented by clinical evaluation or confirmed by any microbiological method) were also  
124 recorded. The following biochemical variables were recorded: glucose, urea, SCr, uric acid,  
125 glycated hemoglobin, lipids, liver enzymes, electrolytes, hemoglobin, platelets, leukocytes,  
126 and lymphocytes. Imaging studies, such as chest radiography or tomography, were performed  
127 on all patients upon hospital admission. Disease severity was assessed using the Acute  
128 Physiology and Chronic Health Evaluation II (APACHE II) scoring system and sequential  
129 organ failure assessment (SOFA). Glomerular filtration rate (eGFR) was estimated using the  
130 CKD-EPI formula (27).

131 Patients with chronic kidney disease (CKD), kidney transplant, obstructive kidney  
132 comorbidities, single kidney, neoplastic or autoimmune diseases, chronic use of anti-  
133 inflammatory drugs, and use of immunosuppressant drugs were excluded from the study.

134 The present study complies with the ethical principles for medical research in human beings  
135 as stipulated by the Declaration of Helsinki, 64th General Assembly, Fortaleza, Brazil,  
136 October 2013, in addition to adhering to the standards of good clinical practice. All  
137 procedures were performed according to the national regulations stipulated in the General  
138 Health Legal Guidelines for Health Care Research in Mexico, 2nd Title, Ethical Aspects for  
139 Research in Human Beings, Chapter 1, Article 17. The study protocol was reviewed and  
140 approved by the Ethics Committee of the Hospital Civil de Guadalajara, "Dr. Juan I  
141 Menchaca" (*HCG-JIM*). Registration number: 17CI14 039 116 COFEPRIS. Guadalajara,  
142 Jalisco, México.

#### 143 **Consent to participate statement**

144 All patients signed informed consent forms prior to hospital admission and provided consent  
145 to participate in the study.

146 ***Inflammatory markers***

147 **Procalcitonin.** Measurements were performed using the sandwich principle of an automated  
148 electrochemiluminescent immunoassay (Cobas E411,Roche).

149 **Ferritin.** Measured using the immunoturbidimetric assay: Image 800 (Dyasys).

150 **Highly sensitive C-reactive protein (hsCRP).** Measurements were performed using a  
151 particle-enhanced immunoturbidimetric assay Cobas® c501 (Roche).

152 **D-Dimer.** Measured using an immunochromatography assay: Ramp®.

153

154 ***Definitions***

155 **SARS CoV-2 pneumonia:** defined by the National Institutes of Health as individuals with  
156 SARS-CoV-2 infection confirmed by RT-PCR testing who have SpO<sub>2</sub> <94% on room air at  
157 sea level, a ratio of arterial partial pressure of oxygen to fraction of inspired oxygen  
158 (PaO<sub>2</sub>/FiO<sub>2</sub>) <300 mmHg, respiratory frequency >30 breaths/min, or lung infiltrates >50%  
159 (28).

160 **Acute kidney injury (AKI) (29):** An abrupt decrease in GFR manifested by an increase in  
161 SCr or oliguria within the first 48 hours to seven days.

162 We classified AKI considering only the increase in SCr:

163 AKI1: Increase in SCr 1.5 to 1.9 times the baseline level, or an increase of >0.3 mg/dl.

164 AKI2: Increase in SCr 2 to 2.9 times the baseline level.

165 AKI3: Increase in SCr by 3 times the baseline, an increase of SCr >4 mg/dl, or the onset of  
166 renal replacement therapy.

167

168 ***Statistical analysis***

169 The data are presented as mean ± standard deviation or median, numbers, and percentages  
170 where appropriate. Student's t-test or the Mann-Whitney U test, depending on the distribution,  
171 was used to compare groups. The Cox proportional hazards model was used to estimate the  
172 risk of AKI. Survival free of AKI and mortality was evaluated using the Kaplan-Meier test.  
173 Statistical analysis was performed using SPSS™ software, version 17. Statistical significance  
174 was set at  $p < 0.05$ .

175

176

177 Results

178 A total of 291 patients were eligible for inclusion in this study. The average age was 57±14  
 179 years, and 68% (n=198) corresponded to the male sex. At the time of hospital admission, the  
 180 average body mass index (BMI) was 31 kg/m<sup>2</sup>, and approximately 40% of the patients had an  
 181 associated comorbidity (DM or SAH). Ninety-five percent (95%) of the patients required  
 182 some form of supplementary oxygen, and 20% were categorized as having severe illness  
 183 requiring high-flow nasal cannulas and/or invasive mechanical ventilation (IMV) with an  
 184 average of 9.5 days of hospitalization. On admission, no infectious processes other than the  
 185 infection due to COVID-19, and all patients received dexamethasone at a dosage of 6 mg/day  
 186 for 10 days during their hospital stay. The baseline characteristics of the patients are presented  
 187 in TABLE 1.

188 **Table 1. Demographic characteristics of patients with acute kidney injury (AKI) and**  
 189 **COVID-19.**

| <b>Characteristics</b>          | <b>Total<br/>n=291</b> | <b>AKI<br/>n=118</b> | <b>No AKI<br/>n=173</b> |
|---------------------------------|------------------------|----------------------|-------------------------|
| <b>Age (years)</b>              | 57 ± 14                | 61 ± 14*             | 54 ± 13*                |
| <b>Sex- Masculine, n (%)</b>    | 198 (68)               | 88 (75) *            | 110 (64) *              |
| <b>Smoking, n (%)</b>           | 89 (31)                | 41 (35)              | 48 (28)                 |
| <b>Hospitalization (days)</b>   | 9.5 ± 7.0              | 12 ± 7.8*            | 7.7 ± 5.7*              |
| <b>Comorbidities</b>            |                        |                      |                         |
| BMI, (Kg/m <sup>2</sup> )       | 30.9 ± 6.9             | 31.2 ± 7.5           | 30.6 ± 6.4              |
| Diabetes, n (%)                 | 113 (39)               | 55 (46.6) *          | 58 (33.5) *             |
| Hypertension, n (%)             | 112 (38)               | 58 (49.2) *          | 54 (31.2) *             |
| <b>Oxygen requirement n (%)</b> |                        |                      |                         |
| No use                          | 5 (1.7%)               | ----                 | 5 (2.9%)                |
| Nasal prongs                    | 94 (32.3%)             | 30 (25.5%)           | 64 (37%)                |
| Mask                            | 133 (45.7%)            | 49 (41.5%)           | 84 (48.6%)              |
| High flow                       | 42 (14.4%)             | 28 (23.7%)           | 14 (8 %)                |
| CPAP                            | 1 (0.3%)               | ----                 | 1 (0.6)                 |
| IMV                             | 16 (5.5%)              | 11 (9.3%)            | 5 (2.9)                 |

|                                          |                |                  |                 |
|------------------------------------------|----------------|------------------|-----------------|
| <b>Medications use</b>                   |                |                  |                 |
| Metformin, n (%)                         | 72 (25)        | 38 (32.2) *      | 34 (19.7) *     |
| ACEi or ARBs, n (%)                      | 75 (26)        | 25 (21)          | 50 (29)         |
| Diuretics, n (%)                         | 51 (18)        | 44 (37) *        | 7 (4) *         |
| Dexamethasone, n (%)                     | 285 (97.9)     | 116 (98.3)       | 169 (98)        |
| <b>Evaluation of scales</b>              |                |                  |                 |
| APACHE II (pts)                          | 9.70 ± 5.43    | 12.7 ± 6.0*      | 7.7 ± 3.9*      |
| SOFA (pts)                               | 3.06 ± 2.40    | 4.1 ± 3.0*       | 2.40 ± 1.50*    |
| <b>Laboratory exams at admission</b>     |                |                  |                 |
| Hemoglobin (gr/dL)                       | 14.65 ± 2.30   | 14.4 ± 2.4       | 14.8 ± 2.2      |
| Leukocytes (x10 <sup>9</sup> /L)         | 11.16 ± 5.21   | 12.6 ± 5.58      | 10.0 ± 4.7      |
| Lymphocytes (x10 <sup>9</sup> /L)        | 9.73 ± 5.17    | 0.94 ± 0.52      | 1.0 ± 0.51      |
| Platelets (x10 <sup>9</sup> /L)          | 263 ± 89       | 266 ± 91         | 260 ± 87        |
| Glucose (mg/dL)                          | 183 ± 121      | 215 ± 151*       | 161 ± 88*       |
| Hemoglobin A1c (%)                       | 7.9 ± 2.5      | 8.18 ± 2.6       | 7.8 ± 2.4       |
| <b>Inflammatory markers at admission</b> |                |                  |                 |
| LDH (u/L)                                | 391 ± 169      | 428 ± 166        | 367 ± 168       |
| Ferritin (µg/L)                          | 815 ± 529      | 884 ± 592        | 737 ± 486       |
| D-Dimer (mg/mL)                          | 434(170-1483)  | 670(230- 2706)*  | 327(148-927)*   |
| CRP (mg/dL)                              | 148 ± 108      | 158 ± 110        | 142 ± 107       |
| Procalcitonin (ng/mL)                    | 0.28(0.11-.77) | 0.72(0.34-2.01)* | 0.16(0.09-.34)* |
| <b>Severe Sepsis/Septic Shock, n (%)</b> | 66 (23)        | 58 (49) *        | 8 (4.6) *       |
| <b>Creatinine, at baseline (mg/dL)</b>   | .80 ± 0.19     | 0.87 ± 0.22      | 0.74 ± 0.15     |
| <b>Stages of AKI, n (%)</b>              |                |                  |                 |
| 1                                        | ---            | 61(51.7%)        | ---             |
| 2                                        | ---            | 16 (13.6 %)      | ---             |
| 3                                        | ---            | 41 (34.7%)       | ---             |



| Recovery from AKI, n (%) |     |         |     |
|--------------------------|-----|---------|-----|
| Yes                      | --- | 65 (55) | --- |
| No                       | --- | 53 (45) | --- |

190 **AKI:** acute kidney injury; **BMI:** body mass index; **CRP:** C-reactive protein; **LDH:** lactate  
191 dehydrogenase; **CPAP:** continuous positive airway pressure; **IMV:** invasive mechanical  
192 ventilation. **ACEi or ARBs:** angiotensin-converting enzyme inhibitors or angiotensin  
193 receptor blockers \* $p<0.05$  Comparison between groups with and without AKI.

194

195 *Acute kidney injury (AKI):* AKI was recorded in 40.5% (118 of the 291 patients). Seventy-one  
196 patients (21%) had stage 1 AKI, 16 (6%) had stage 2 AKI, and 41 (14%) had stage 3 AKI.  
197 The development of severe sepsis or septic shock during follow-up was documented in 49%  
198 (58 of 118) ( $p<0.05$ ). In the group that developed AKI, male sex predominated (75% vs. 64%  
199 in the group without AKI, respectively), older age (61 vs. 54 years), and prolonged hospital  
200 stay (12 vs. 7.7 days) ( $p<0.05$ ). Approximately 50% of patients with AKI had some type of  
201 associated comorbidity (DM or SAH) compared to only 30% in the group without AKI  
202 ( $p<0.05$ ). The use of dexamethasone, angiotensin-converting enzyme inhibitors (ACEi), and  
203 angiotensin receptor blockers (ARBs) was similar in both groups, whereas the use of diuretics  
204 was higher in patients with AKI. The highest points in severity on the APACHE II and SOFA  
205 scores at the time of hospital admission were recorded in patients who developed AKI  
206 ( $p<0.05$ ). Baseline hemoglobin, platelets, leukocytes, lymphocytes, CRP, LDH, and ferritin  
207 levels at hospital admission did not differ between groups, while glucose levels (215 vs. 161),  
208 PCT (0.72 vs. 0.16), and D-dimer (670 mg/dL vs. 327 mg/dL) ( $p=0.001$ ) were significantly  
209 higher in patients with AKI than in those without AKI. During follow-up, inflammatory  
210 markers in AKI stages 2 and 3 presented higher levels of PCT on days 6 and 12 ( $p = 0.009$   
211 and  $p = 0.012$ , respectively), ferritin on days 6 and 12 ( $p=NS$ ), and D-dimer on day 6 ( $p=$   
212  $0.017$ ). TABLE 2

213

214

215

216

217

218 **Table 2. Markers of inflammation on hospitalization and during follow-up in patients**  
 219 **with COVID-19 and acute kidney injury (AKI).**

|                              | <b>AKI total</b><br><b>N = 118</b> | <b>AKI 1</b><br><b>N = 61</b> | <b>AKI 2 and 3</b><br><b>N = 57</b> |
|------------------------------|------------------------------------|-------------------------------|-------------------------------------|
| <b>Ferritin</b>              |                                    |                               |                                     |
| On hospitalization           | 884±592                            | 839±479                       | 933±699                             |
| Day-3                        | 815±508                            | 637±392                       | 964±520                             |
| Day-6                        | 846±499                            | 594±423                       | 1111±439                            |
| Day-12                       | 972±510                            | 781±516                       | 1104±482                            |
| <b>LDH (u/L)</b>             |                                    |                               |                                     |
| On hospitalization           | 428±166                            | 396±168                       | 462±158                             |
| Day-3                        | 474±391 <sup>§</sup>               | 388±249                       | 578±498                             |
| Day-6                        | 383±157                            | 368±132                       | 416±176                             |
| Day-12                       | 339±140                            | 340±153                       | 339±133                             |
| <b>D-Dimer (ng/mL)</b>       |                                    |                               |                                     |
| On hospitalization           | 670 (230-2706)                     | 543 (210-1830)                | 970 (274-3260)                      |
| Day-3                        | 1259 (472-4308)                    | 921(239-3683)                 | 2264 (855-2264)                     |
| Day-6                        | 1727 (646-3911)                    | 960 (588-2534)*               | 2928 (868-5000)*                    |
| Day-12                       | 1782 (708-3201)                    | 1007 (461-1940)               | 2234 (1702-4452)                    |
| <b>CRP (mg/dL)</b>           |                                    |                               |                                     |
| On hospitalization           | 158±110                            | 148±109                       | 171±112                             |
| Day-3                        | 105±100 <sup>§</sup>               | 83±86                         | 125±107                             |
| Day-6                        | 85±91                              | 78±110                        | 91±72                               |
| Day-12                       | 115±76                             | 81±76                         | 143±66                              |
| <b>Procalcitonin (ng/mL)</b> |                                    |                               |                                     |
| On hospitalization           | 0.72 (0.34-2.01)                   | 0.53 (0.22-1.13)*             | 1.0 (0.52-2.80)*                    |
| Day-3                        | 0.42(0.20-1.90)                    | 0.28 (0.15-0.64)*             | 1.13 (0.33-7.52)*                   |
| Day-6                        | 0.49 (0.16-1.56)                   | 0.23 (0.11-.62)*              | 1.29 (0.20-3.9)*                    |
| Day-12                       | 1.18 (0.37-2.96)                   | 0.43 (0.15-1.16)*             | 1.94 (0.56-6.10)*                   |

220 **AKI:** acute kidney injury; **CRP:** C-reactive protein; **LDH:** lactate dehydrogenase; §  $p < 0.05$  vs. No AKI  
 221 \* $p = < 0.05$  AKI 1 vs. AKI 2 and 3.

222

223 In the multivariate analysis, phosphate higher ( $p = 0.002$ , RR 1.39, CI 95% 1.13 – 1.72), PCT  
224 level  $>0.5$  ng/ml on hospitalization ( $p = 0.005$ , RR 2.09, CI 95% 1.26-3.50), and points  $>15$  ( $p$   
225  $= 0.011$ ; RR 2.0 CI 95% 1.17-3.40) showed a significant association with the development of  
226 AKI. TABLE 3

227 **Table 3. Multivariate analysis for risk factors associated with AKI in patients**  
228 **with COVID-19.**

| Variable      | Multivariate Analysis |             |       |
|---------------|-----------------------|-------------|-------|
|               | RR                    | CI 95%      | P     |
| Phosphate     | 1.39                  | 1.13 – 1.72 | 0.002 |
| APACHE        | 2.0                   | 1.17 – 3.40 | 0.011 |
| Procalcitonin | 2.09                  | 1.26 – 3.50 | 0.005 |

229

230 Fifty-five percent of those who developed AKI recovered kidney function, the majority of  
231 whom had AKI stage 1. The survival analysis free of AKI according to PCT levels ( $\geq 0.5$   
232 ng/ml) ( $p = 0.001$ ) and points on the APACHE score ( $>15$  points) ( $p = 0.004$ ) demonstrated a  
233 lower survival. FIGURE 1.

Figure 1

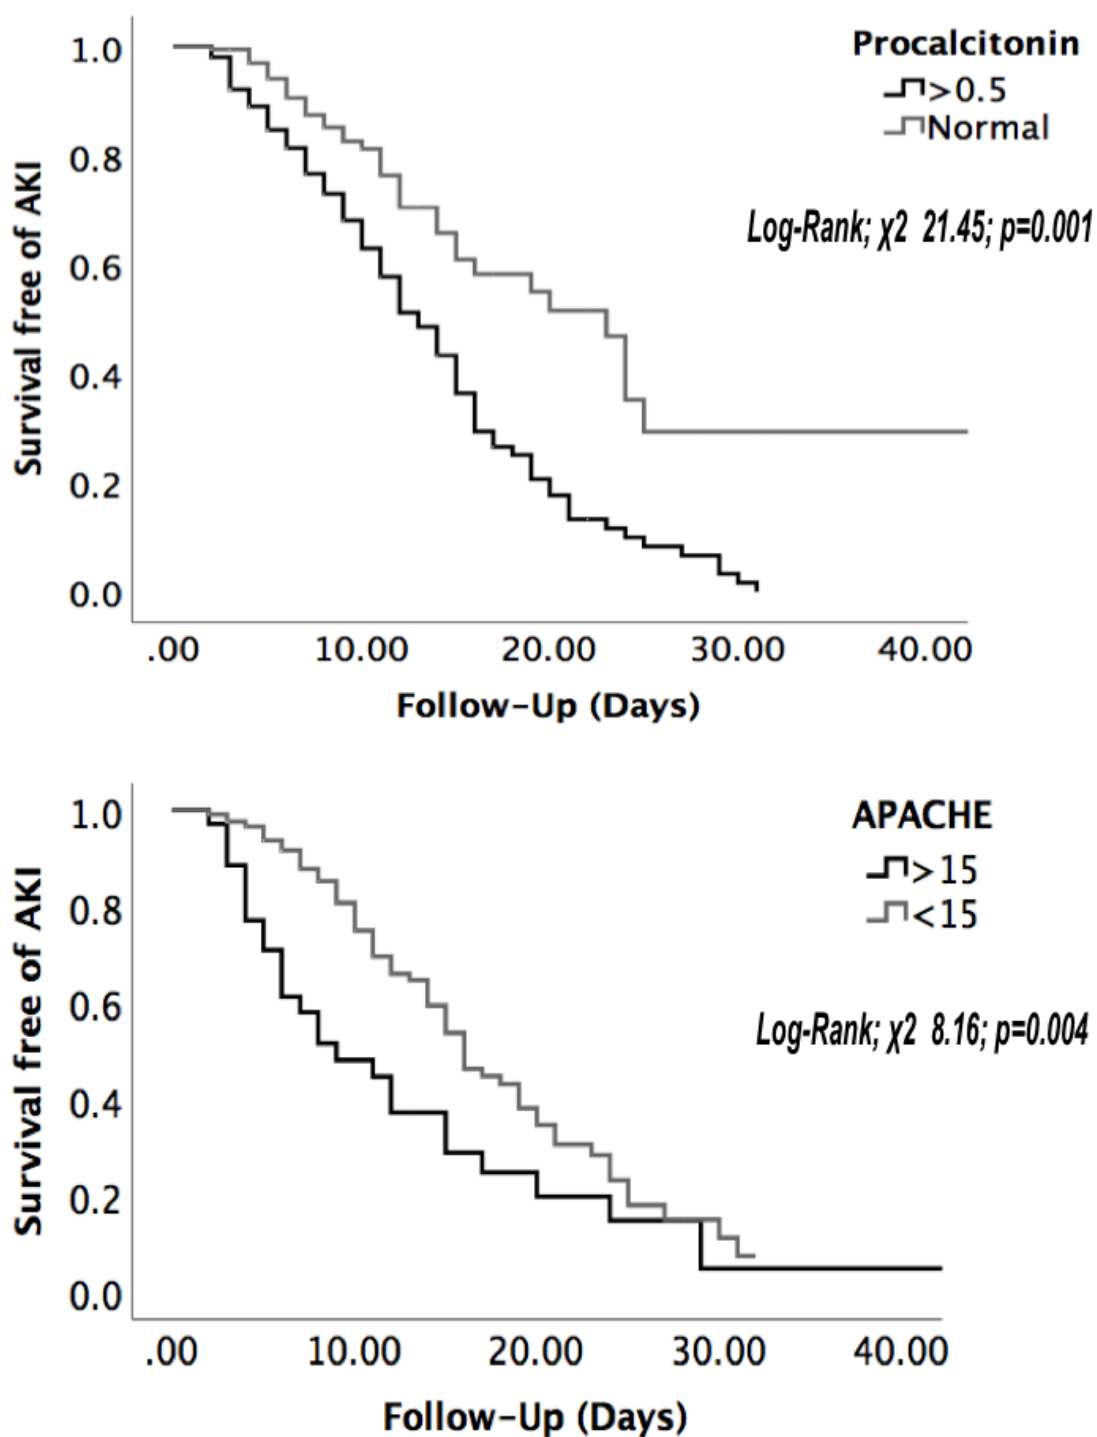

234

235 **DISCUSSION**

236 The present study concurs with the Latin American registry (30), which describes a high  
237 frequency of AKI (65%). In Mexico, incidences of 33.7 and 58.6% are reported, where half

238 correspond to severe cases, with comorbidities consistent with the present study, where we  
239 documented that 30% of patients were overweight or had some degree of obesity.(31, 32)  
240 The development of AKI has been associated not only with obesity but also with being  
241 overweight (33). The present study did not perform an analysis of the obesity subgroups, but  
242 both study groups had similar BMIs, and there was no demonstrated association with the  
243 development of AKI. We found a high prevalence of SAH and DM with higher  
244 concentrations of glucose and HbA1C in those who developed AKI, but these were not  
245 associated with risk. Our results are consistent with the literature, where age is a risk factor  
246 for severe illness (19) and leads to a higher risk of AKI (34). Hirsch et al. demonstrated a  
247 higher risk of AKI (*OR 1.03, CI 95% 1.03-1.04; p < 0.001*) in those aged >60 years (7).  
248 Similarly, Fisher et al. (35) reported that older age (67 vs. 60 years; *p < 0.001*) was an  
249 independent risk factor for developing AKI. In Mexico, Casas-Aparicio *et al.* associated  
250 higher age with AKI development (*OR 1.07, CI 95% 1.01 - 1.13; p = 0.024*) (31). In our  
251 cohort, although the AKI group were older ( $61 \pm 14$  vs  $54 \pm 13$ ; *p < 0.001*), we were unable to  
252 consolidate these results not achieving statistical significance. Hyperphosphatemia is related  
253 to the risks of AKI and mortality(36). In this cohort we did not find hyperphosphatemia but  
254 but phosphatase levels were higher in AKI group. There is evidence that AKI is a phenomenon  
255 associated with the activation of proinflammatory cytokines, and with this, it calls for the use  
256 of markers of kidney injury (27). Some biomarkers predict AKI(37); however, the high costs  
257 and lack of availability of these tests in our region forced us to use biochemical parameters  
258 that are within reach in our practice to predict AKI events. PCT is barely detectable in healthy  
259 individuals; however, diverse conditions tend to elevate it (surgery, trauma, burns,  
260 pancreatitis, and sepsis), where levels can be markedly high (38-42). One of the advantages of  
261 PCT is its rapid increase 6 h after the onset of the inflammatory process (27). The elimination  
262 pathway of PCT is not clear, but due to its low molecular weight and deterioration of kidney  
263 function, it can elevate its levels; therefore, it is not a reliable parameter in the case of illness  
264 because the thresholds are different (43-45). Considering this aspect, the present study  
265 excluded patients with the onset of deterioration of kidney function and any patient who had  
266 conditions that would affect PCT values. The present multivariate analysis showed a  
267 significant risk for the development of AKI, with PCT rates >0.5 ng/ml at the moment of  
268 hospitalization. Some studies have demonstrated an association between PCT and the  
269 development of kidney damage in contexts other than COVID-19 (20, 38-40). Feng *et al.*  
270 showed the sensitivity (76%) and specificity (75%) of PCT in predicting AKI (*OR 9.63, 95%*  
271 *CI 95% 4.38–21.18*) (38), and Chun K. *et al.* (39) reported that in septic patients hospitalized

272 in an intensive care unit (ICU), PCT was significantly high ( $p < 0.001$ ) and was associated  
273 with AKI ( $OR\ 1.006, 1,000-1,011; p = 0,035$ ). In the present study, 50% of the patients who  
274 developed AKI had a case of severe sepsis or septic shock that developed during their hospital  
275 stay ( $p < 0.05$ ); however, our analysis did not demonstrate an association of the risk for the  
276 development of AKI. Regarding COVID-19, Wang *et al.* found that PCT levels were a  
277 predictor of kidney damage (46). This association can be measured by an exaggerated  
278 inflammatory response, even if the pathophysiological mechanism is unclear (47, 48). As a  
279 crucial component of the inflammatory cascade, the expression of PCT can be correlated with  
280 the levels of systemic inflammation and the development of AKI in patients with COVID-19  
281 (63). Procalcitonin is a chemoattractant produced by monocytes in the inflammatory area,  
282 which contributes to the increase and recruitment of parenchymal cells with greater release of  
283 cytokines associated with acute kidney damage (39). Another implicated mechanism is the  
284 direct toxic effect of PCT on mesangial cells and apoptosis (48). Additionally, other markers  
285 demonstrate increments dependent on the reduction of the GFT (49), and in AKI, CRP and D-  
286 dimer levels have been shown to be high (31). The reduction in kidney function can explain  
287 our results of the increase in D-dimer levels predominantly in stages 2 and 3 of AKI;  
288 however, the analysis did not show an association with the risk for AKI. In severely ill  
289 patients, the APACHE II score is used over the long term to predict hospital mortality up to  
290 28 days in different contexts (sepsis and pancreatitis). Zou *et al.* documented excellent  
291 discriminative power for mortality in patients with COVID-19 with point scores  $\geq 17$  (50). In  
292 the context of COVID-19, the APACHE II score was also associated with AKI in a Latin  
293 American cohort ( $OR\ 1.97, CI\ 95\% 1.08-2.64; p < 0.05$ ), with higher mortality in those who  
294 had higher point scores ( $OR\ 1.08, CI\ 95\%, 1.02-1.98; p < 0.05$ ) and in those who developed  
295 stage 3 AKI ( $OR\ 1.11, CI\ 95\%, 1.05-2.57; p < 0.05$ ). These data support that in COVID-19  
296 patients, AKI is a decisive phenomenon in the prognosis of these patients (67). In different  
297 studies on patients with COVID-19, higher APACHE II scores have been associated with  
298 poor prognosis and AKI severity (68, 69). We found that  $>15$  points on the APACHE II score  
299 demonstrated significance for the development of AKI, which could be explained by the  
300 severity of the clinical scenario of COVID-19 and the patient's comorbidities upon  
301 hospitalization. Until now, it remains unknown whether recovery from AKI in COVID-19  
302 differs from other forms of AKI, and the direct, long-term impact of the SARS CoV-2 virus  
303 on kidney function in those who regain function remains unclear; however, the  
304 recommendation is a follow-up period of at least 2 to 3 months(51). Despite the high  
305 incidence of AKI, the majority of our patients had a favorable prognosis regarding recovery of

306 kidney function, since more than half of the patients studied had an improvement in GFR;  
307 however, progression from stages 2 to 3 was associated with poor recovery.

### 308 **CONCLUSIONS**

309 In this retrospective cohort, significantly high PCT levels were found on hospital admission in  
310 patients who developed AKI, and this was a predictor of AKI development. The trajectory of  
311 PCT throughout the follow-up did not show significant differences between those who did  
312 and did not develop AKI. Therefore, the use of PCT reinforces the importance of this marker  
313 as a predictor for the development of AKI in patients with COVID-19 infection without  
314 superinfections when admitted to the hospital.

### 315 **LIMITATIONS**

316 The present study had some limitations. We recognize that this study is unicentric. However,  
317 being a referral center for patients infected with SARS-CoV-2 who do not have social security  
318 in our region favors extrapolation of the results to other populations, especially in those with  
319 limited access to health care. The majority of patients before hospitalization had passed a  
320 considerable amount of time since acquiring the viral infection; therefore, subclinical bacterial  
321 superinfection could not be ruled out. Economic limitations (lack of treatment with  
322 continuous slow therapies) could influence the lack of recovery of kidney function, especially  
323 in those who developed severe AKI. Finally, the lack of measurement and/or comparison of  
324 markers valid for AKI does not permit the determination of PCT levels.

### 325 **Data Availability**

326 Most clinical data are restricted to protecting information from misuse. The data may be  
327 shared by the OPD, Hospital Civil de Guadalajara, and Dr. Juan I Menchaca (*HCG-JIM*) after  
328 approval from the Ethics Committee of the Institution. The data supporting the findings of this  
329 study are available from the corresponding author upon reasonable request.

### 330 **Conflict of interest**

331 All the authors have declared no conflicts of interest.

### 332 **Funding statement**

333 The study did not receive any private or governmental funding.

334 **Acknowledgements**

335 Not applicable.

336 **Author Contributions**

337 a) Conception and design for: Jorge Andrade-Sierra, Claudia Delgado Astorga and  
338 Enrique Rojas Campos.

339 b) Analysis and interpretation of data: Jorge Andrade-Sierra, Claudia Delgado Astorga,  
340 Miriam Gabriela Nava Vargas and Enrique Rojas Campos.

341 c) Drafting and critically revising the article for important intellectual content: Jorge  
342 Andrade-Sierra, Karla Hernández Morales, Carlos A Andrade Castellanos, Javier  
343 Arellano Arteaga, Andrade-Ortega Antonio de Jesús, Luis Gerardo González-Correa.

344 d) Final approval of the version to be published: All the team.

345

346

347

348

349 **REFERENCES**

350 1. <https://covid19.who.int/region/amro/country/mx>.

351 2. Tian W, Jiang W, Yao J, Nicholson CJ, Li RH, Sigurslid HH, et al. Predictors of  
352 mortality in hospitalized COVID-19 patients: A systematic review and meta-analysis.  
353 *J Med Virol.* 2020;92(10):1875-83.

354 3. Bertsimas D, Lukin G, Mingardi L, Nohadani O, Orfanoudaki A, Stellato B, et al.  
355 COVID-19 mortality risk assessment: An international multi-center study. *PLoS One.*  
356 2020;15(12):e0243262.

357 4. Cheng Y, Luo R, Wang K, Zhang M, Wang Z, Dong L, et al. Kidney disease is  
358 associated with in-hospital death of patients with COVID-19. *Kidney Int.*  
359 2020;97(5):829-38.

360 5. Izzedine H, Jhaveri KD. Acute kidney injury in patients with COVID-19: an update  
361 on the pathophysiology. *Nephrol Dial Transplant.* 2021;36(2):224-6.

362 6. Pei G, Zhang Z, Peng J, Liu L, Zhang C, Yu C, et al. Renal Involvement and  
363 Early Prognosis in Patients with COVID-19 Pneumonia. *J Am Soc Nephrol.*  
364 2020;31(6):1157-65.

365 7. Hirsch JS, Ng JH, Ross DW, Sharma P, Shah HH, Barnett RL, et al. Acute  
366 kidney injury in patients hospitalized with COVID-19. *Kidney Int.* 2020;98(1):209-18.

367 8. Moledina DG, Simonov M, Yamamoto Y, Alausa J, Arora T, Biswas A, et al. The  
368 Association of COVID-19 With Acute Kidney Injury Independent of Severity of Illness:  
369 A Multicenter Cohort Study. *Am J Kidney Dis.* 2021;77(4):490-9 e1.

370 9. Singh J, Malik P, Patel N, Pothuru S, Israni A, Chakinala RC, et al. Kidney  
371 disease and COVID-19 disease severity-systematic review and meta-analysis. *Clin*  
372 *Exp Med.* 2022;22(1):125-35.

373 10. Raina R, Mahajan ZA, Vasistha P, Chakraborty R, Mukunda K, Tibrewal A, et al.  
374 Incidence and Outcomes of Acute Kidney Injury in COVID-19: A Systematic Review.  
375 *Blood Purif.* 2022;51(3):199-212.



- 376 11. Ali H, Daoud A, Mohamed MM, Salim SA, Yessayan L, Baharani J, et al. Survival  
377 rate in acute kidney injury superimposed COVID-19 patients: a systematic review and  
378 meta-analysis. *Ren Fail.* 2020;42(1):393-7.
- 379 12. Lim JH, Park SH, Jeon Y, Cho JH, Jung HY, Choi JY, et al. Fatal Outcomes of  
380 COVID-19 in Patients with Severe Acute Kidney Injury. *J Clin Med.* 2020;9(6).
- 381 13. Diao B, Wang C, Wang R, Feng Z, Zhang J, Yang H, et al. Human kidney is a  
382 target for novel severe acute respiratory syndrome coronavirus 2 infection. *Nat*  
383 *Commun.* 2021;12(1):2506.
- 384 14. Abbate M, Rottoli D, Gianatti A. COVID-19 Attacks the Kidney: Ultrastructural  
385 Evidence for the Presence of Virus in the Glomerular Epithelium. *Nephron.*  
386 2020;144(7):341-2.
- 387 15. Martinez-Rojas MA, Vega-Vega O, Bobadilla NA. Is the kidney a target of SARS-  
388 CoV-2? *Am J Physiol Renal Physiol.* 2020;318(6):F1454-F62.
- 389 16. Ronco C, Reis T. Kidney involvement in COVID-19 and rationale for  
390 extracorporeal therapies. *Nat Rev Nephrol.* 2020;16(6):308-10.
- 391 17. Nadim MK, Forni LG, Mehta RL, Connor MJ, Jr., Liu KD, Ostermann M, et al.  
392 COVID-19-associated acute kidney injury: consensus report of the 25th Acute  
393 Disease Quality Initiative (ADQI) Workgroup. *Nat Rev Nephrol.* 2020;16(12):747-64.
- 394 18. Joannidis M, Forni LG, Klein SJ, Honore PM, Kashani K, Ostermann M, et al.  
395 Lung-kidney interactions in critically ill patients: consensus report of the Acute  
396 Disease Quality Initiative (ADQI) 21 Workgroup. *Intensive Care Med.* 2020;46(4):654-  
397 72.
- 398 19. Ou M, Zhu J, Ji P, Li H, Zhong Z, Li B, et al. Risk factors of severe cases with  
399 COVID-19: a meta-analysis. *Epidemiol Infect.* 2020;148:e175.
- 400 20. Huang I, Pranata R, Lim MA, Oehadian A, Alisjahbana B. C-reactive protein,  
401 procalcitonin, D-dimer, and ferritin in severe coronavirus disease-2019: a meta-  
402 analysis. *Ther Adv Respir Dis.* 2020;14:1753466620937175.
- 403 21. Kermali M, Khalsa RK, Pillai K, Ismail Z, Harky A. The role of biomarkers in  
404 diagnosis of COVID-19 - A systematic review. *Life Sci.* 2020;254:117788.
- 405 22. Ciaccio M, Agnello L. Biochemical biomarkers alterations in Coronavirus Disease  
406 2019 (COVID-19). *Diagnosis (Berl).* 2020;7(4):365-72.
- 407 23. Menez S, Moledina DG, Thiessen-Philbrook H, Wilson FP, Obeid W, Simonov M,  
408 et al. Prognostic Significance of Urinary Biomarkers in Patients Hospitalized With  
409 COVID-19. *Am J Kidney Dis.* 2022;79(2):257-67 e1.
- 410 24. Mahmudpour M, Roozbeh J, Keshavarz M, Farrokhi S, Nabipour I. COVID-19  
411 cytokine storm: The anger of inflammation. *Cytokine.* 2020;133:155151.
- 412 25. Ragab D, Salah Eldin H, Taeimah M, Khattab R, Salem R. The COVID-19  
413 Cytokine Storm; What We Know So Far. *Front Immunol.* 2020;11:1446.
- 414 26. Ronco C, Reis T, Husain-Syed F. Management of acute kidney injury in patients  
415 with COVID-19. *Lancet Respir Med.* 2020;8(7):738-42.
- 416 27. Levey AS, Stevens LA, Schmid CH, Zhang YL, Castro AF, 3rd, Feldman HI, et al.  
417 A new equation to estimate glomerular filtration rate. *Ann Intern Med.*  
418 2009;150(9):604-12.
- 419 28. <https://www.covid19treatmentguidelines.nih.gov/overview/clinical-spectrum/> [  
420 29. Levey AS, Eckardt KU, Dorman NM, Christiansen SL, Hoorn EJ, Ingelfinger JR,  
421 et al. Nomenclature for kidney function and disease: report of a Kidney Disease:  
422 Improving Global Outcomes (KDIGO) Consensus Conference. *Kidney Int.*  
423 2020;97(6):1117-29.
- 424 30. Lombardi R, Ferreira A, Ponce D, Claire-Del Granada R, Aroca G, Venegas Y,  
425 et al. Latin American registry of renal involvement in COVID-19 disease. *The*

- 426 relevance of assessing proteinuria throughout the clinical course. *PLoS One*.  
427 2022;17(1):e0261764.
- 428 31. Casas-Aparicio GA, Leon-Rodriguez I, Alvarado-de la Barrera C, Gonzalez-  
429 Navarro M, Peralta-Prado AB, Luna-Villalobos Y, et al. Acute kidney injury in patients  
430 with severe COVID-19 in Mexico. *PLoS One*. 2021;16(2):e0246595.
- 431 32. Chavez-Iniguez JS, Cano-Cervantes JH, Maggiani-Aguilera P, Lavelle-Gongora  
432 N, Marcial-Meza J, Camacho-Murillo EP, et al. Mortality and evolution between  
433 community and hospital-acquired COVID-AKI. *PLoS One*. 2021;16(11):e0257619.
- 434 33. van Son J, Oussaada SM, Sekercan A, Beudel M, Dongelmans DA, van Assen  
435 S, et al. Overweight and Obesity Are Associated With Acute Kidney Injury and Acute  
436 Respiratory Distress Syndrome, but Not With Increased Mortality in Hospitalized  
437 COVID-19 Patients: A Retrospective Cohort Study. *Front Endocrinol (Lausanne)*.  
438 2021;12:747732.
- 439 34. Chan L, Chaudhary K, Saha A, Chauhan K, Vaid A, Zhao S, et al. AKI in  
440 Hospitalized Patients with COVID-19. *J Am Soc Nephrol*. 2021;32(1):151-60.
- 441 35. Fisher M, Neugarten J, Bellin E, Yunes M, Stahl L, Johns TS, et al. AKI in  
442 Hospitalized Patients with and without COVID-19: A Comparison Study. *J Am Soc*  
443 *Nephrol*. 2020;31(9):2145-57.
- 444 36. Moon H, Chin HJ, Na KY, Joo KW, Kim YS, Kim S, et al. Hyperphosphatemia  
445 and risks of acute kidney injury, end-stage renal disease, and mortality in hospitalized  
446 patients. *BMC Nephrol*. 2019;20(1):362.
- 447 37. Lin J, Chen J, Wu D, Li X, Guo X, Shi S, et al. Biomarkers for the early prediction  
448 of contrast-induced nephropathy after percutaneous coronary intervention in adults:  
449 A systematic review and meta-analysis. *Angiology*. 2022;73(3):207-17.
- 450 38. Feng Y, He H, Jia C, Xu Z, Li Y, Liao D. Meta-analysis of procalcitonin as a  
451 predictor for acute kidney injury. *Medicine (Baltimore)*. 2021;100(10):e24999.
- 452 39. Chun K, Chung W, Kim AJ, Kim H, Ro H, Chang JH, et al. Association between  
453 acute kidney injury and serum procalcitonin levels and their diagnostic usefulness in  
454 critically ill patients. *Sci Rep*. 2019;9(1):4777.
- 455 40. Nie X, Wu B, He Y, Huang X, Dai Z, Miao Q, et al. Serum procalcitonin predicts  
456 development of acute kidney injury in patients with suspected infection. *Clin Chem*  
457 *Lab Med*. 2013;51(8):1655-61.
- 458 41. Dias BH, Rozario AP, Olakkengil SA, V A. Procalcitonin Strip Test as an  
459 Independent Predictor in Acute Pancreatitis. *The Indian journal of surgery*.  
460 2015;77(Suppl 3):1012-7.
- 461 42. Simsek O, Kocael A, Kocael P, Orhan A, Cengiz M, Balci H, et al. Inflammatory  
462 mediators in the diagnosis and treatment of acute pancreatitis: pentraxin-3,  
463 procalcitonin and myeloperoxidase. *Archives of Medical Science*. 2018;14(2):288-96.
- 464 43. Level C, Chauveau P, Delmas Y, Lasseur C, Pelle G, Peuchant E, et al.  
465 Procalcitonin: a new marker of inflammation in haemodialysis patients? *Nephrol Dial*  
466 *Transplant*. 2001;16(5):980-6.
- 467 44. Nakamura Y, Murai A, Mizunuma M, Ohta D, Kawano Y, Matsumoto N, et al.  
468 Potential use of procalcitonin as biomarker for bacterial sepsis in patients with or  
469 without acute kidney injury. *J Infect Chemother*. 2015;21(4):257-63.
- 470 45. Amour J, Birenbaum A, Langeron O, Le Manach Y, Bertrand M, Coriat P, et al.  
471 Influence of renal dysfunction on the accuracy of procalcitonin for the diagnosis of  
472 postoperative infection after vascular surgery. *Crit Care Med*. 2008;36(4):1147-54.
- 473 46. Wang RR, He M, Kang Y. A risk score based on procalcitonin for predicting acute  
474 kidney injury in COVID-19 patients. *J Clin Lab Anal*. 2021;35(6):e23805.

- 475 47. Okusa MD. The inflammatory cascade in acute ischemic renal failure. *Nephron*.  
476 2002;90(2):133-8.
- 477 48. Araujo M, Doi SQ, Palant CE, Nylen ES, Becker KL. Procalcitonin induced  
478 cytotoxicity and apoptosis in mesangial cells: implications for septic renal injury.  
479 *Inflamm Res*. 2013;62(10):887-94.
- 480 49. Spring JL, Winkler A, Levy JH. The influence of various patient characteristics on  
481 D-dimer concentration in critically ill patients and its role as a prognostic indicator in  
482 the intensive care unit setting. *Clin Lab Med*. 2014;34(3):675-86.
- 483 50. Zou X, Li S, Fang M, Hu M, Bian Y, Ling J, et al. Acute Physiology and Chronic  
484 Health Evaluation II Score as a Predictor of Hospital Mortality in Patients of  
485 Coronavirus Disease 2019. *Crit Care Med*. 2020;48(8):e657-e65.
- 486 51. Kashani K, Rosner MH, Haase M, Lewington AJP, O'Donoghue DJ, Wilson FP,  
487 et al. Quality Improvement Goals for Acute Kidney Injury. *Clin J Am Soc Nephrol*.  
488 2019;14(6):941-53.

489

490

491

## 492 **Figure Legends**

493 **Table 1.** Demographic characteristics of patients diagnosed with acute kidney injury (AKI)  
494 and COVID-19.

495 **Table 2.** Markers of inflammation on hospitalization and during follow-up in patients with  
496 COVID-19 and acute kidney injury (AKI).

497 **Table 3.** Multivariate analysis for risk factors associated with acute kidney injury (AKI) in  
498 patients with COVID-19.

499 **Figure 1.** Acute kidney injury-free time according to procalcitonin and APACHE score.
